# Supplementary material
Source: PubMed Central journal article supplement (PMC2784695)
Supplement: NIHMS135763-supplement-1.pdf [file NIHMS135763-supplement-1.pdf]

Suppl. Figure 1 (Lee et al.,)

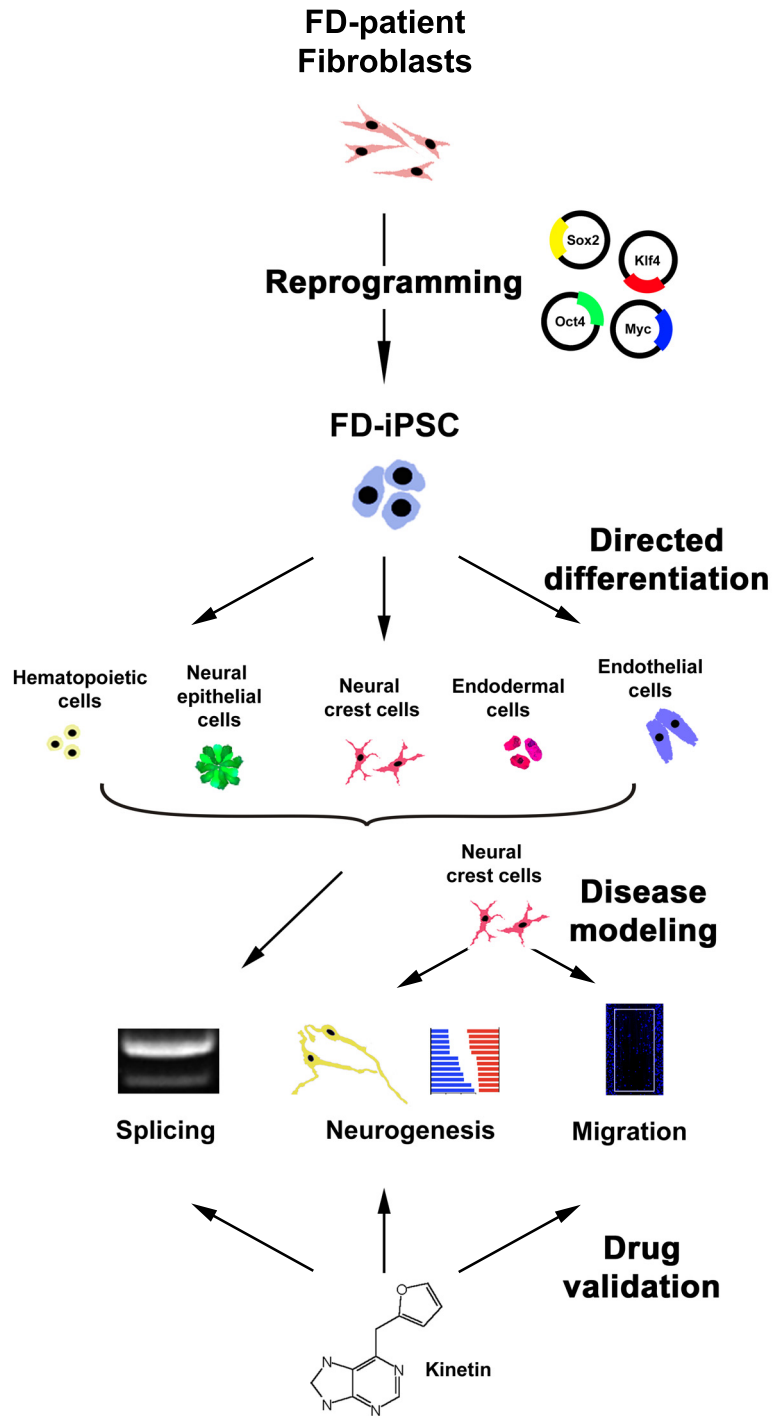

Suppl. Figure 2 (Lee et al.,)

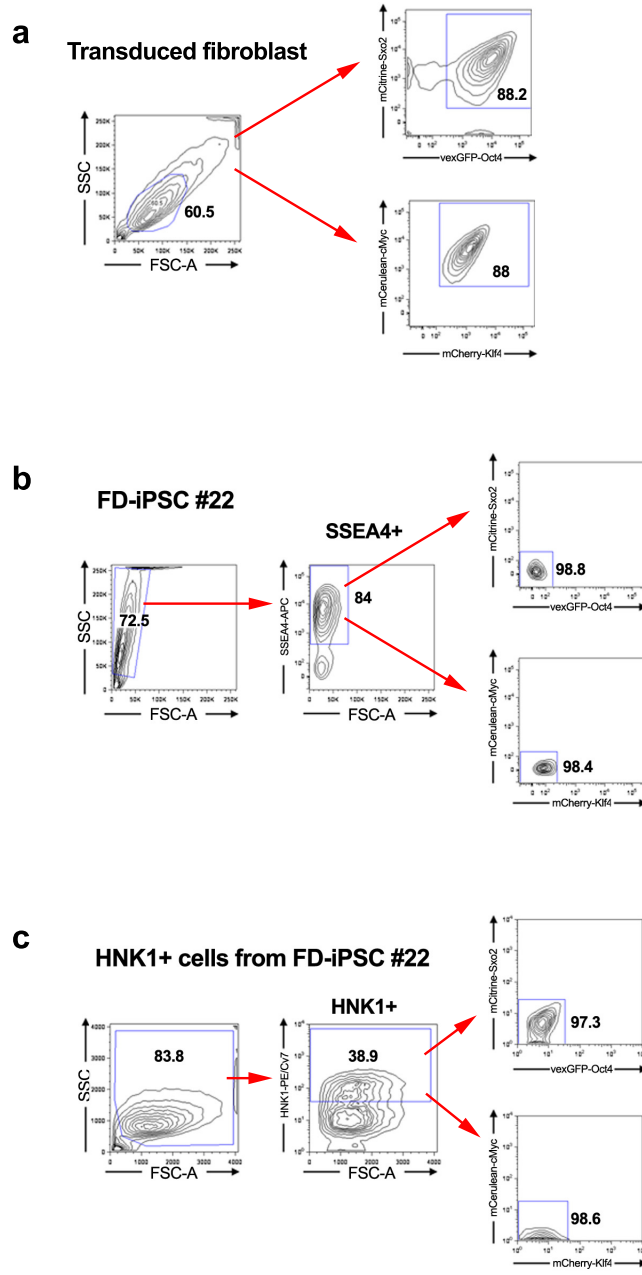

Suppl. Figure 3 (Lee et al.,)

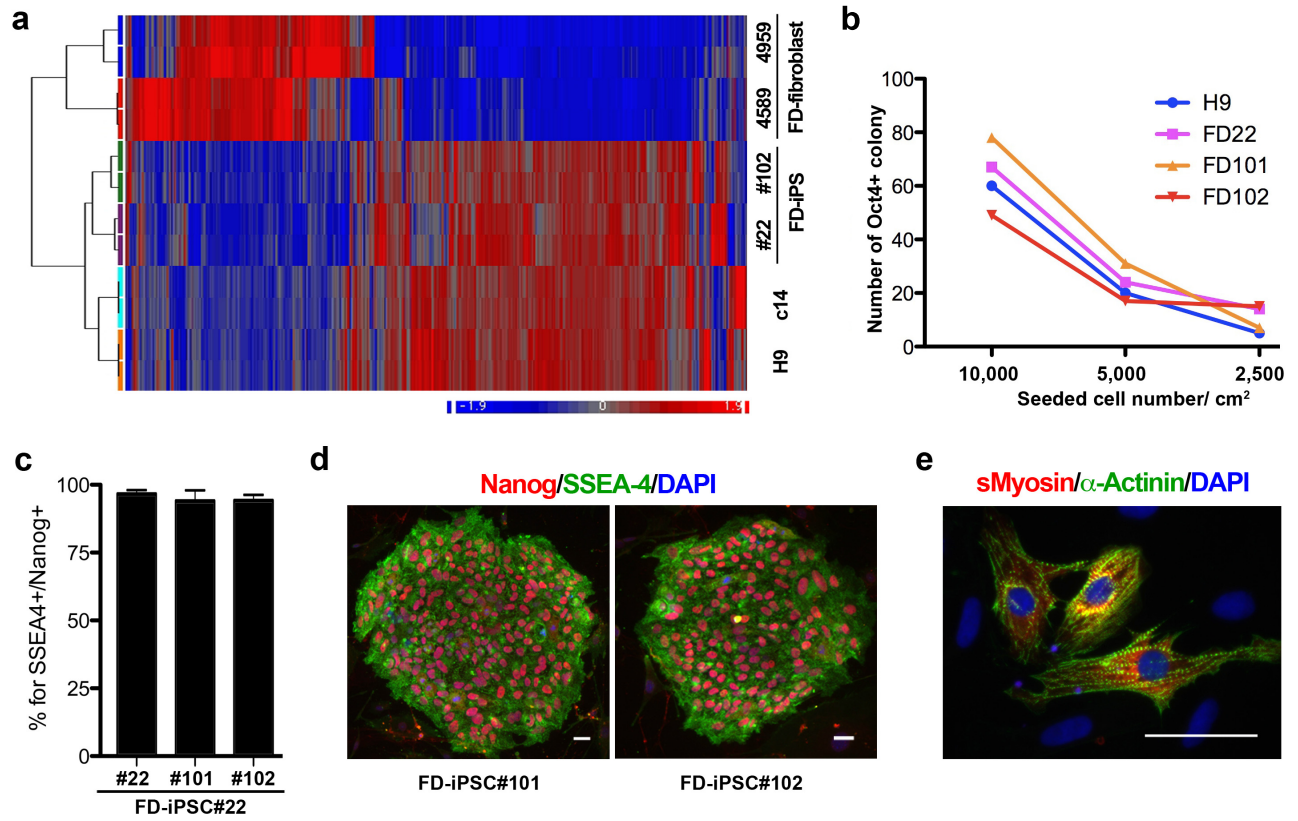

**Suppl. Figure 4 (Lee et al.,)**

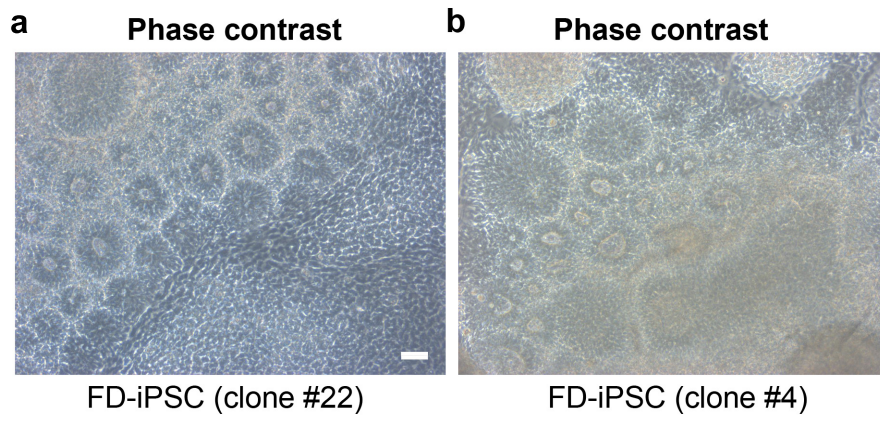

Suppl. Figure 5 (Lee et al.,)

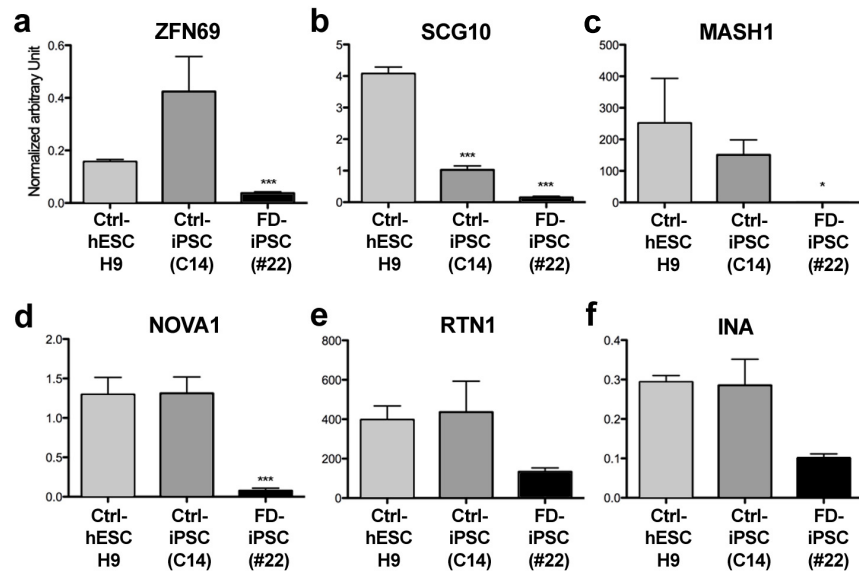

Suppl. Figure 6 (Lee et al.,)

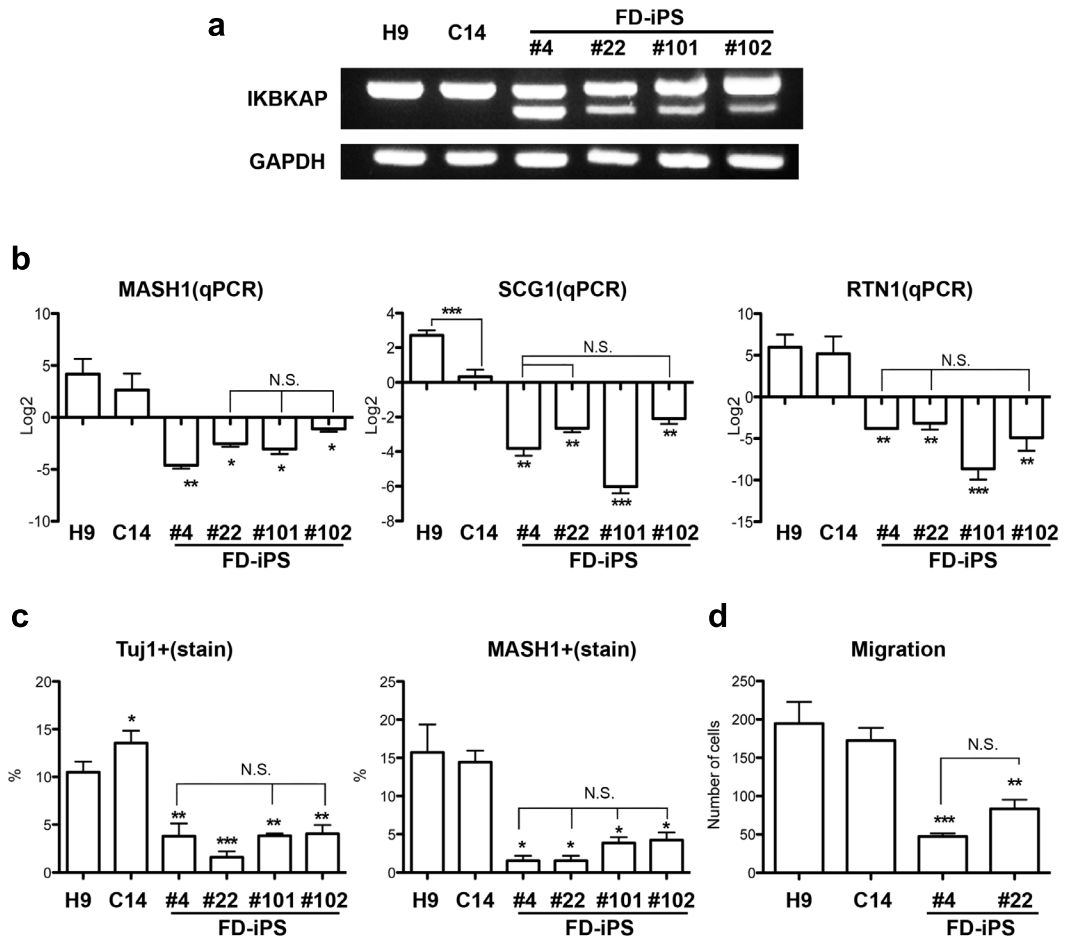

**Suppl. Figure 7 (Lee et al.,)**

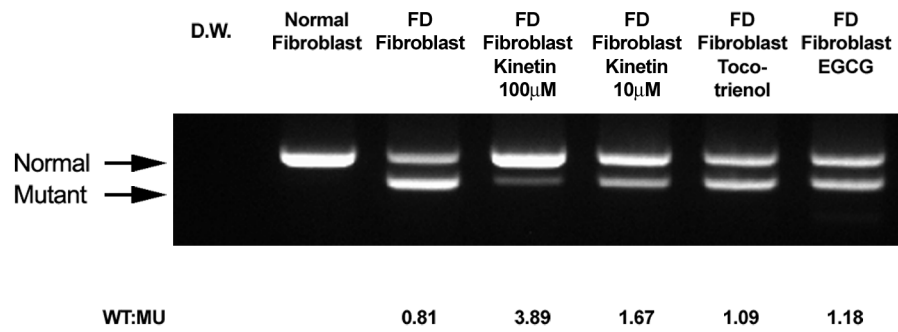

**Suppl. Figure 8 (Lee et al.,)**

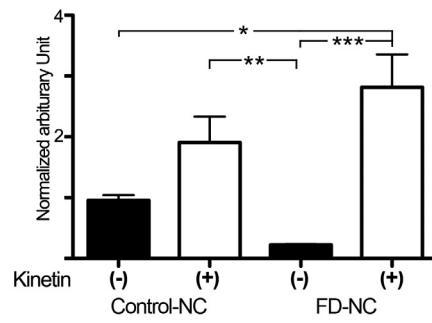



Suppl. Figure 9 (Lee et al.,)

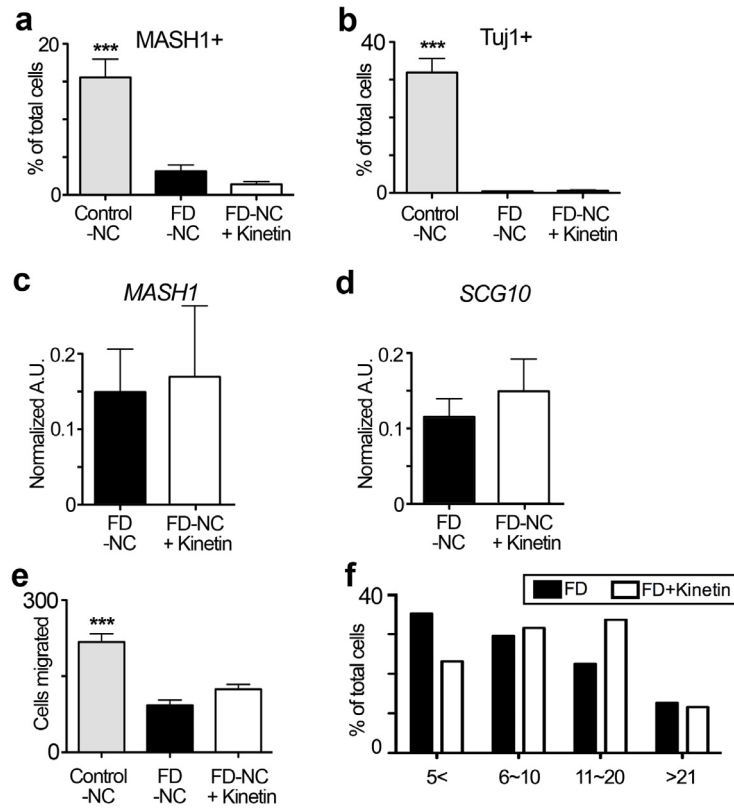

Suppl. Figure 10 (Lee et al.,)

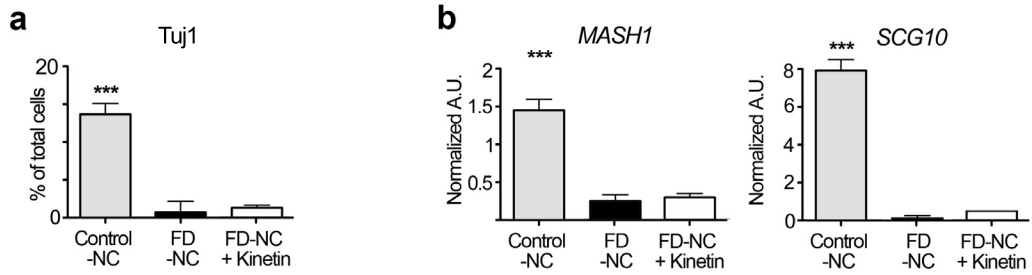

**Suppl. Figure 11 (Lee et al.,)**

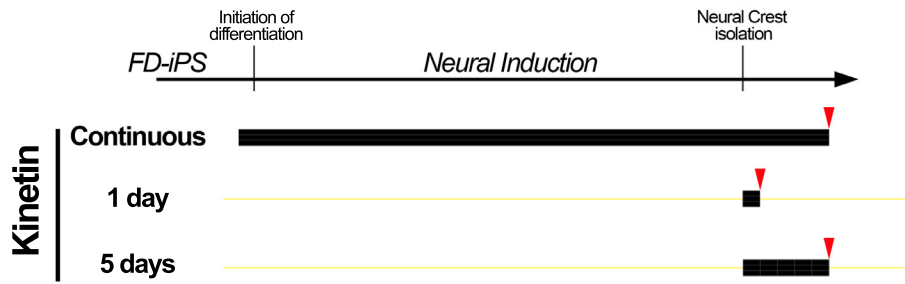

**Supplementary Table 1 (Lee et al.,)**

| <b>Marker</b> | <b>FD-fibroblast</b> |     | <b>FD-iPSC#22</b> |     | <b>FD-FD-iPSC#4</b> |     |
|---------------|----------------------|-----|-------------------|-----|---------------------|-----|
| Amelogenin    | X                    |     | X                 |     | X                   |     |
| CSF1PO        | 10                   | 11  | 10                | 11  | 10                  | 11  |
| D13S317       | 11                   | 12  | 11                | 12  | 11                  | 12  |
| D16S539       | 9                    | 12  | 9                 | 12  | 9                   | 12  |
| D18S51        | 12                   | 14  | 12                | 14  | 12                  | 14  |
| D19S433       | 12                   | 15  | 12                | 15  | 12                  | 15  |
| D21S11        | 28                   | 29  | 28                | 29  | 28                  | 29  |
| D2S1338       | 19                   | 23  | 19                | 23  | 19                  | 23  |
| D3S1358       | 14                   | 18  | 14                | 18  | 14                  | 18  |
| D5S818        | 10                   | 12  | 10                | 12  | 10                  | 12  |
| D7S820        | 9                    | 11  | 9                 | 11  | 9                   | 11  |
| D8S1179       | 13                   | 16  | 13                | 16  | 13                  | 16  |
| FGA           | 20                   | 22  | 20                | 22  | 20                  | 22  |
| TH01          | 9                    | 9.3 | 9                 | 9.3 | 9                   | 9.3 |
| TPOX          | 10                   | 11  | 10                | 11  | 10                  | 11  |
| vWA           | 15                   |     | 15                |     | 15                  |     |

DNA fingerprinting of FD-iPSC showed DNA characteristics of FD-fibroblasts.

## Supplementary Table 2 (Lee et al.,)

| Transcript  | ILMN_Gene | Source_Reference_ID | logFC       | P.Value     |
|-------------|-----------|---------------------|-------------|-------------|
| ILMN_4794   | C21ORF81  | NM_153750.1         | 2.884173408 | 1.57E-06    |
| ILMN_18538  | H19       | NR_002196.1         | 2.683173843 | 8.96E-07    |
| ILMN_22149  | FLJ21986  | NM_024913.3         | 2.196014735 | 7.38E-05    |
| ILMN_180334 | VWF       | NM_000552.3         | 2.148790098 | 2.90E-05    |
| ILMN_29279  | FBLN2     | NM_001998.2         | 1.955337897 | 1.70E-05    |
| ILMN_164846 | KIAA0644  | NM_014817.3         | 1.8580555   | 8.46E-06    |
| ILMN_169116 | AFAP1L2   | NM_001001936.1      | 1.809489839 | 1.16E-05    |
| ILMN_163188 | FIGF      | NM_004469.2         | 1.659135983 | 4.31E-07    |
| ILMN_89328  | HS.389313 | Hs.389313           | 1.619566677 | 0.00014895  |
| ILMN_15736  | IL13RA1   | NM_001560.2         | 1.421286302 | 7.49E-07    |
| ILMN_6495   | TNFRSF11B | NM_002546.3         | 1.395579468 | 0.000118736 |
| ILMN_27265  | CHURC1    | NM_145165.2         | 1.319049502 | 2.89E-05    |
| ILMN_20259  | PLP1      | NM_199478.1         | 1.304739937 | 0.000153142 |
| ILMN_307977 | MORC4     | NM_001085354.1      | 1.278624579 | 9.45E-05    |
| ILMN_9206   | CRYM      | NM_001888.2         | 1.27301767  | 9.32E-05    |
| ILMN_164531 | ANKRD38   | NM_181712.3         | 1.268192544 | 0.000215291 |
| ILMN_12751  | OAF       | NM_178507.2         | 1.245942985 | 0.000183826 |
| ILMN_3829   | ACCS      | NM_032592.2         | 1.242753727 | 4.45E-06    |
| ILMN_6177   | BMP4      | NM_130851.1         | 1.214781214 | 9.37E-06    |
| ILMN_25028  | TF        | NM_001063.2         | 1.173448362 | 4.01E-06    |
| ILMN_27821  | CLYBL     | NM_206808.1         | 1.160927576 | 0.000300404 |
| ILMN_17554  | AMMECR1   | NM_015365.2         | 1.145738141 | 1.18E-06    |
| ILMN_23394  | HPRT1     | NM_000194.1         | 1.14085776  | 0.000142328 |
| ILMN_9568   | ASB9      | NM_024087.1         | 1.129005008 | 2.72E-07    |
| ILMN_9206   | CRYM      | NM_001888.2         | 1.117264    | 0.00011581  |
| ILMN_169203 | CP        | NM_000096.2         | 1.114868946 | 5.38E-06    |
| ILMN_26975  | TYW3      | NM_138467.1         | 1.077157196 | 1.79E-05    |
| ILMN_5077   | PIGA      | NM_020473.2         | 1.077150524 | 2.71E-05    |
| ILMN_18271  | SULF2     | NM_018837.2         | 1.052286338 | 9.23E-05    |
| ILMN_165827 | HDHD1A    | NM_012080.3         | 1.039753973 | 4.92E-05    |
| ILMN_32090  | LOC644366 | XM_932149.2         | 1.037078593 | 2.11E-05    |
| ILMN_28362  | WWC3      | NM_015691.2         | 1.023915639 | 0.000146221 |
| ILMN_15956  | RDH10     | NM_172037.2         | 1.016464442 | 1.79E-05    |
| ILMN_22647  | KLHL14    | NM_020805.1         | 1.011945814 | 9.16E-05    |
| ILMN_170030 | DACT1     | NM_001079520.1      | 1.0115147   | 7.85E-05    |
| ILMN_8247   | NHS       | NM_198270.2         | 0.997469947 | 9.30E-05    |
| ILMN_22146  | PRDX4     | NM_006406.1         | 0.992339772 | 2.72E-05    |
| ILMN_30265  | LEF1      | NM_016269.2         | 0.98741625  | 7.91E-06    |
| ILMN_166179 | SIRPA     | NM_001040023.1      | 0.987323268 | 1.65E-05    |
| ILMN_19796  | MPP1      | NM_002436.2         | 0.97883542  | 3.69E-05    |
| ILMN_182292 | HEYL      | NM_014571.3         | 0.971764912 | 0.000120107 |
| ILMN_166444 | STAG2     | NM_001042750.1      | 0.970232869 | 2.57E-05    |
| ILMN_163323 | TPBG      | NM_006670.3         | 0.960905245 | 0.000291825 |
| ILMN_26072  | NGFRAP1   | NM_206917.1         | 0.957603275 | 0.000322568 |
| ILMN_22194  | HAS2      | NM_005328.1         | 0.944399507 | 0.000280537 |

## Supplementary Table 2 (Lee et al.,)

|             |           |                |             |             |
|-------------|-----------|----------------|-------------|-------------|
| ILMN_164415 | HAS2      | XM_001128807.1 | 0.93840572  | 6.02E-05    |
| ILMN_3010   | WBP5      | NM_001006612.1 | 0.920411226 | 0.000175809 |
| ILMN_73496  | HS.71947  | Hs.71947       | 0.917546503 | 2.08E-05    |
| ILMN_5029   | CBS       | NM_000071.1    | 0.913170628 | 1.67E-05    |
| ILMN_5795   | RAX       | NM_013435.2    | 0.906463612 | 3.04E-05    |
| ILMN_85013  | HS.291319 | Hs.291319      | 0.906289783 | 2.32E-05    |
| ILMN_18271  | SULF2     | NM_018837.2    | 0.897743953 | 3.00E-05    |
| ILMN_19027  | PSMD10    | NM_002814.2    | 0.888655839 | 3.43E-05    |
| ILMN_20959  | PCDH19    | NM_020766.1    | 0.885838233 | 1.19E-05    |
| ILMN_22027  | SLC38A11  | NM_173512.1    | 0.860141115 | 1.33E-05    |
| ILMN_7975   | FHL1      | NM_001449.3    | 0.857598387 | 0.000161719 |
| ILMN_176398 | COL23A1   | NM_173465.2    | 0.856824604 | 0.000225299 |
| ILMN_12677  | TCEAL8    | NM_001006684.1 | 0.855293138 | 2.07E-06    |
| ILMN_23068  | SMARCA1   | NM_003069.2    | 0.838378876 | 2.45E-05    |
| ILMN_26730  | LAMP2     | NM_013995.1    | 0.838034666 | 3.73E-05    |
| ILMN_9293   | PDHA1     | NM_000284.1    | 0.837072167 | 1.16E-05    |
| ILMN_28481  | ID2       | NM_002166.4    | 0.830936556 | 0.000226611 |
| ILMN_26857  | AXIN2     | NM_004655.2    | 0.816805575 | 7.73E-06    |
| ILMN_22164  | EIF1AX    | NM_001412.3    | 0.805545406 | 1.85E-05    |
| ILMN_10409  | USMG5     | NM_032747.2    | 0.803370001 | 3.39E-05    |
| ILMN_163255 | OCRL      | NM_000276.3    | 0.796037809 | 4.26E-05    |
| ILMN_37889  | USP9X     | NM_001039591.2 | 0.793629928 | 0.000260908 |
| ILMN_19667  | HTATSF1   | NM_014500.3    | 0.793215684 | 5.96E-05    |
| ILMN_19772  | PDE5A     | NM_001083.3    | 0.789485664 | 0.000273453 |
| ILMN_1730   | RAP2C     | NM_021183.3    | 0.786792349 | 5.56E-06    |
| ILMN_180156 | CREB3L2   | NM_194071.2    | 0.785504886 | 0.000163805 |
| ILMN_74815  | HS.104091 | Hs.104091      | 0.774955229 | 1.07E-06    |
| ILMN_13785  | UTX       | NM_021140.1    | 0.766985507 | 0.000290741 |
| ILMN_23116  | BEX1      | NM_018476.3    | 0.762644144 | 6.59E-05    |
| ILMN_20106  | PGM1      | NM_002633.2    | 0.760365507 | 2.34E-05    |
| ILMN_22254  | ARHGAP28  | NM_001010000.1 | 0.747663989 | 0.00029084  |
| ILMN_8725   | RPGR      | NM_001023582.1 | 0.733410555 | 0.000275051 |
| ILMN_26490  | NLGN4X    | NM_020742.2    | 0.733132843 | 0.000321327 |
| ILMN_20584  | CDC7      | NM_003503.2    | 0.727371538 | 0.000178866 |
| ILMN_28618  | RP2       | NM_006915.1    | 0.715778613 | 0.000116116 |
| ILMN_21750  | C1GALT1C1 | NM_152692.3    | 0.701170121 | 5.19E-05    |
| ILMN_29762  | CLEC1A    | NM_016511.2    | 0.700781636 | 1.40E-05    |
| ILMN_15237  | IPO8      | NM_006390.2    | 0.696485446 | 0.000192633 |
| ILMN_18732  | TMEM31    | NM_182541.2    | 0.687915774 | 9.91E-05    |
| ILMN_10088  | OFD1      | NM_003611.1    | 0.671580571 | 0.000177409 |
| ILMN_17284  | RAB9A     | NM_004251.3    | 0.662475513 | 0.00015034  |
| ILMN_26730  | LAMP2     | NM_013995.1    | 0.662264402 | 4.31E-05    |
| ILMN_23417  | PRPS2     | NM_001039091.1 | 0.659686656 | 0.000192231 |
| ILMN_15188  | DOCK10    | NM_014689.2    | 0.657730755 | 0.000205074 |
| ILMN_19890  | RPS4X     | NM_001007.3    | 0.653681381 | 7.87E-05    |
| ILMN_24186  | LHX8      | NM_001001933.1 | 0.647794808 | 0.000326443 |
| ILMN_23657  | MTR       | NM_000254.1    | 0.646912901 | 3.61E-05    |
| ILMN_170623 | LOC642559 | XR_016333.1    | 0.64012685  | 0.000145557 |
| ILMN_22104  | AIFM1     | NM_145813.1    | 0.634321488 | 2.37E-05    |

## Supplementary Table 2 (Lee et al.,)

|             |           |                |             |             |
|-------------|-----------|----------------|-------------|-------------|
| ILMN_30026  | MERTK     | NM_006343.2    | 0.632919526 | 0.000302029 |
| ILMN_24904  | STARD8    | NM_014725.2    | 0.629368615 | 0.000240782 |
| ILMN_3319   | LRIG1     | NM_015541.2    | 0.620981665 | 0.000153504 |
| ILMN_25519  | ATG4A     | NM_178270.1    | 0.620616295 | 8.60E-05    |
| ILMN_25647  | SLC25A5   | NM_001152.1    | 0.620083744 | 7.77E-06    |
| ILMN_169671 | LOC286467 | XR_015266.1    | 0.61799742  | 3.64E-05    |
| ILMN_17171  | WDR44     | NM_019045.3    | 0.617232333 | 0.000112327 |
| ILMN_131699 | HS.579518 | Hs.579518      | 0.604306342 | 4.45E-05    |
| ILMN_1522   | FANCB     | NM_152633.2    | 0.587872974 | 5.91E-05    |
| ILMN_11525  | APOE      | NM_000041.2    | 0.58557308  | 0.000231617 |
| ILMN_175509 | NET1      | NM_001047160.1 | 0.584096975 | 2.18E-06    |
| ILMN_166518 | YAP1      | NM_006106.2    | 0.556459087 | 2.90E-05    |
| ILMN_18046  | TWIST2    | NM_057179.1    | 0.552554793 | 6.79E-06    |
| ILMN_181875 | RPS6KA3   | NM_004586.2    | 0.548639506 | 0.000263203 |
| ILMN_16069  | EDN3      | NM_207032.1    | 0.54104333  | 1.00E-05    |
| ILMN_3567   | ROR1      | NM_005012.2    | 0.539583468 | 0.000287733 |
| ILMN_19975  | MIA       | NM_006533.2    | 0.537253661 | 0.000282071 |
| ILMN_171723 | SMC2      | NM_001042550.1 | 0.53185848  | 8.55E-05    |
| ILMN_23479  | IQSEC2    | NM_015075.1    | 0.53009245  | 0.000147209 |
| ILMN_177774 | GPR126    | NM_020455.4    | 0.526376828 | 0.000207223 |
| ILMN_12432  | DHRS3     | NM_004753.4    | 0.525894258 | 3.94E-06    |
| ILMN_25582  | DEPDC1    | NM_017779.3    | 0.498595489 | 0.000237899 |
| ILMN_28002  | ID1       | NM_181353.1    | 0.497939255 | 0.000277894 |
| ILMN_170277 | POU5F1    | NM_002701.4    | 0.484508506 | 7.66E-06    |
| ILMN_169022 | BMP2      | NM_001200.2    | 0.479601899 | 2.89E-05    |
| ILMN_181787 | IKBKE     | NM_014002.2    | 0.479477756 | 0.000193999 |
| ILMN_22712  | FAM122B   | NM_145284.3    | 0.468291624 | 2.41E-06    |
| ILMN_24569  | PDXK      | NM_003681.4    | 0.461893446 | 2.80E-06    |
| ILMN_26705  | SRPX      | NM_006307.3    | 0.458070261 | 0.0001431   |
| ILMN_27702  | C8ORF13   | NM_053279.1    | 0.453752189 | 1.08E-05    |
| ILMN_20617  | CA5B      | NM_007220.3    | 0.450853468 | 1.26E-05    |
| ILMN_42330  | SLC45A4   | XM_933796.2    | 0.448688479 | 0.00027581  |
| ILMN_7487   | FLJ31132  | NM_001004355.1 | 0.44656077  | 0.000202479 |
| ILMN_8440   | GPRASP2   | NM_001004051.1 | 0.438519885 | 8.11E-05    |
| ILMN_18157  | EMILIN1   | NM_007046.1    | 0.434469609 | 7.15E-05    |
| ILMN_29247  | MSL3L1    | NM_078628.1    | 0.431502822 | 0.000109569 |
| ILMN_92871  | HS.444855 | Hs.444855      | 0.424172966 | 3.17E-05    |
| ILMN_20235  | SYNGR1    | NM_145731.2    | 0.42313116  | 1.48E-05    |
| ILMN_14307  | SLC25A14  | NM_003951.2    | 0.421913233 | 0.000158984 |
| ILMN_18859  | STX3      | NM_004177.3    | 0.412478292 | 0.000137231 |
| ILMN_103172 | HS.537004 | Hs.537004      | 0.409781484 | 0.000152344 |
| ILMN_23251  | ZNF662    | NM_207404.2    | 0.401750516 | 5.16E-05    |
| ILMN_18521  | MID2      | NM_052817.1    | 0.399179402 | 0.000260594 |
| ILMN_956    | ZNF75     | NM_007131.2    | 0.397562592 | 0.000278883 |
| ILMN_7177   | HGD       | NM_000187.1    | 0.390303393 | 0.000113639 |
| ILMN_25738  | TTYH2     | NM_032646.5    | 0.385889219 | 0.000193798 |
| ILMN_103797 | HS.538259 | Hs.538259      | 0.385058436 | 0.00027486  |
| ILMN_161945 | BCORL1    | NM_021946.2    | 0.376136034 | 0.000117928 |
| ILMN_14813  | LDLRAP1   | NM_015627.2    | 0.369663222 | 7.27E-05    |

## Supplementary Table 2 (Lee et al.,)

|             |           |                |              |             |
|-------------|-----------|----------------|--------------|-------------|
| ILMN_21688  | MME       | NM_000902.3    | 0.367565997  | 0.000277213 |
| ILMN_23078  | RPIA      | NM_144563.2    | 0.367296775  | 7.81E-05    |
| ILMN_931    | GPR160    | NM_014373.1    | 0.364640035  | 0.000205152 |
| ILMN_27164  | SEPP1     | NM_005410.2    | 0.364417234  | 0.000222209 |
| ILMN_22194  | HAS2      | NM_005328.1    | 0.35902335   | 0.000199264 |
| ILMN_28399  | NGFR      | NM_002507.1    | 0.357734075  | 0.000112569 |
| ILMN_22028  | ARHGAP19  | NM_032900.4    | 0.350878962  | 0.00023207  |
| ILMN_26013  | RAI2      | NM_021785.2    | 0.34613041   | 0.000244523 |
| ILMN_309219 | C20ORF82  | NM_080826.1    | 0.334799173  | 0.000283987 |
| ILMN_45448  | CTSF      | NM_003793.3    | 0.331369106  | 0.00010391  |
| ILMN_12434  | RERG      | NM_032918.1    | 0.322305768  | 4.01E-05    |
| ILMN_307543 | C14ORF130 | NM_001100417.1 | 0.310926674  | 0.000307753 |
| ILMN_41170  | INF2      | NM_001031714.3 | 0.295177226  | 6.93E-05    |
| ILMN_10700  | PGM5      | NM_021965.3    | 0.294643365  | 1.72E-05    |
| ILMN_74924  | HS.105618 | Hs.105618      | 0.292457512  | 0.000286041 |
| ILMN_27828  | BFSP1     | NM_001195.2    | 0.288533421  | 0.000145854 |
| ILMN_172286 | HCCS      | NM_005333.2    | 0.288364856  | 0.000162565 |
| ILMN_7428   | KLK6      | NM_001012964.1 | 0.280116571  | 0.000279942 |
| ILMN_28016  | ATP6V1B1  | NM_001692.3    | 0.277345326  | 4.26E-05    |
| ILMN_80916  | HS.187578 | Hs.187578      | 0.265631766  | 0.000233236 |
| ILMN_177952 | RTKN      | NM_033046.2    | 0.262087429  | 0.000202154 |
| ILMN_28062  | C1QTNF7   | NM_031911.3    | 0.262058444  | 0.000206247 |
| ILMN_28278  | LPAR1     | NM_057159.2    | 0.25981454   | 0.000197581 |
| ILMN_41103  | LOC652324 | XM_941748.1    | 0.255901456  | 0.000128672 |
| ILMN_182711 | LOC401233 | NM_001013680.1 | 0.249808399  | 0.00026882  |
| ILMN_170187 | CEP72     | NM_018140.3    | 0.233232472  | 0.000113494 |
| ILMN_21742  | IL1RAP    | NM_002182.2    | 0.232129804  | 0.000234182 |
| ILMN_29986  | PTGS2     | NM_000963.1    | 0.222249286  | 0.00027951  |
| ILMN_162028 | LOC730952 | XR_015744.1    | 0.221323891  | 0.000237112 |
| ILMN_8341   | PCGF5     | NM_032373.3    | 0.191943226  | 0.000299171 |
| ILMN_6269   | SLC17A7   | NM_020309.2    | -0.225586962 | 0.000277297 |
| ILMN_13088  | C8ORF38   | NM_152416.2    | -0.237991248 | 0.000163978 |
| ILMN_164195 | BLOC1S2   | NM_001001342.1 | -0.239252109 | 0.000195439 |
| ILMN_17821  | THRA      | NM_003250.4    | -0.257115766 | 5.84E-05    |
| ILMN_75788  | HS.121667 | Hs.121667      | -0.260006165 | 0.000193671 |
| ILMN_11647  | BZRAP1    | NM_004758.1    | -0.262050903 | 0.000191244 |
| ILMN_29440  | VTCN1     | NM_024626.2    | -0.263750168 | 0.000230314 |
| ILMN_25089  | TESC      | NM_017899.2    | -0.264033668 | 9.14E-05    |
| ILMN_13009  | ACTR1A    | NM_005736.2    | -0.266546702 | 0.000200944 |
| ILMN_21942  | YPEL4     | NM_145008.1    | -0.281596541 | 0.000315452 |
| ILMN_165656 | UNCX      | NM_001080461.1 | -0.303518667 | 0.000107634 |
| ILMN_23420  | PIBF1     | NM_006346.2    | -0.306067635 | 0.000182041 |
| ILMN_16451  | COQ9      | NM_020312.1    | -0.313680845 | 0.000153811 |
| ILMN_136283 | HS.584102 | Hs.584102      | -0.314847887 | 0.00014731  |
| ILMN_28640  | ANKS1B    | NM_181670.2    | -0.338833336 | 0.000131157 |
| ILMN_23436  | NOVA2     | NM_002516.1    | -0.359414642 | 7.82E-05    |
| ILMN_180846 | MYH7      | NM_000257.2    | -0.36651898  | 5.33E-06    |
| ILMN_177693 | SMPD3     | NM_018667.2    | -0.370049068 | 0.000289529 |
| ILMN_13405  | RAP1GAP   | NM_002885.1    | -0.382359504 | 7.31E-05    |



## Supplementary Table 2 (Lee et al.,)

|             |           |                |              |             |
|-------------|-----------|----------------|--------------|-------------|
| ILMN_10774  | RASSF2    | NM_170774.1    | -0.382574509 | 0.000150229 |
| ILMN_12963  | WBP2      | NM_012478.3    | -0.385086055 | 6.27E-05    |
| ILMN_81208  | HS.193406 | Hs.193406      | -0.394864392 | 0.000211454 |
| ILMN_5981   | FLJ20160  | NM_017694.3    | -0.403580966 | 6.73E-05    |
| ILMN_40881  | LOC340260 | XM_941336.2    | -0.404205624 | 0.000123533 |
| ILMN_25826  | SBK1      | NM_001024401.2 | -0.410234615 | 2.98E-05    |
| ILMN_1335   | C11ORF71  | NM_019021.1    | -0.411663934 | 0.000245345 |
| ILMN_10231  | AIM2      | NM_004833.1    | -0.423881294 | 0.000148182 |
| ILMN_22211  | SEMA4A    | NM_022367.2    | -0.433531972 | 0.000235236 |
| ILMN_26493  | HIST1H2AC | NM_003512.3    | -0.43589655  | 7.78E-05    |
| ILMN_25463  | GNG8      | NM_033258.1    | -0.442470365 | 0.000115005 |
| ILMN_166084 | C22ORF9   | NM_015264.1    | -0.448798733 | 0.000139173 |
| ILMN_306709 | ZNF239    | NM_001099283.1 | -0.451881084 | 7.52E-05    |
| ILMN_19930  | TMEM14A   | NM_014051.3    | -0.45293401  | 2.17E-05    |
| ILMN_162145 | FNBP1L    | NM_001024948.1 | -0.470460653 | 1.09E-05    |
| ILMN_23986  | ZMYND10   | NM_015896.2    | -0.477463065 | 0.000108597 |
| ILMN_29380  | TIMM22    | NM_013337.2    | -0.490685362 | 0.000286436 |
| ILMN_166861 | LOC649095 | XM_001131851.1 | -0.49172818  | 6.97E-05    |
| ILMN_178374 | KIAA1409  | NM_020818.3    | -0.49568322  | 4.07E-06    |
| ILMN_23493  | PBX3      | NM_006195.4    | -0.500642008 | 0.000204678 |
| ILMN_30680  | LOC550112 | XR_001037.1    | -0.502558008 | 1.74E-05    |
| ILMN_31415  | LOC202134 | XM_932143.1    | -0.508668662 | 0.000169333 |
| ILMN_3112   | CCDC106   | NM_013301.2    | -0.534474791 | 8.24E-05    |
| ILMN_165884 | LOC728006 | XM_001128698.1 | -0.535781568 | 5.25E-05    |
| ILMN_20458  | PCSK2     | NM_002594.2    | -0.544634679 | 5.74E-05    |
| ILMN_15020  | CBFA2T3   | NM_175931.1    | -0.556092679 | 0.00022127  |
| ILMN_8451   | MXRA7     | NM_001008529.1 | -0.55738466  | 0.000131481 |
| ILMN_14005  | RPAIN     | NM_001033002.2 | -0.572691551 | 0.000178281 |
| ILMN_110827 | HS.552096 | Hs.552096      | -0.574061977 | 0.000280821 |
| ILMN_13103  | PAK7      | NM_177990.1    | -0.588898687 | 1.71E-05    |
| ILMN_26814  | LHX1      | NM_005568.2    | -0.5984156   | 0.000187767 |
| ILMN_29852  | AMY1B     | NM_001008218.1 | -0.613578049 | 7.68E-05    |
| ILMN_21318  | BHLHB5    | NM_152414.3    | -0.614052687 | 0.000179963 |
| ILMN_96141  | HS.486010 | Hs.486010      | -0.622521608 | 0.000220908 |
| ILMN_96169  | HS.486362 | Hs.486362      | -0.626533244 | 4.07E-05    |
| ILMN_175562 | APC2      | NM_005883.2    | -0.65054771  | 0.000218009 |
| ILMN_29751  | SVOP      | NM_018711.2    | -0.65094831  | 8.82E-06    |
| ILMN_28176  | CBLN1     | NM_004352.1    | -0.653246093 | 0.000165549 |
| ILMN_23906  | MTMR7     | NM_004686.3    | -0.653722121 | 0.00021425  |
| ILMN_21527  | BRUNOL6   | NM_052840.3    | -0.657681074 | 6.16E-06    |
| ILMN_24740  | TACC2     | NM_206860.1    | -0.661566344 | 0.000271149 |
| ILMN_10036  | PCBP4     | NM_020418.2    | -0.665597607 | 0.000130201 |
| ILMN_18994  | MICAL1    | NM_022765.2    | -0.676850615 | 0.000141202 |
| ILMN_15964  | DLG2      | NM_001364.2    | -0.685819382 | 8.67E-05    |
| ILMN_171454 | MGC24039  | NM_144973.3    | -0.688171842 | 8.27E-05    |
| ILMN_308156 | GOLSYN    | NM_001099743.1 | -0.6887051   | 1.56E-06    |
| ILMN_71044  | HS.8038   | Hs.8038        | -0.704900772 | 8.78E-06    |
| ILMN_12935  | CAMKK2    | NM_153500.1    | -0.708546037 | 0.000120733 |
| ILMN_14016  | MAST1     | NM_014975.1    | -0.721532367 | 0.000101616 |

## Supplementary Table 2 (Lee et al.,)

|             |           |                |              |             |
|-------------|-----------|----------------|--------------|-------------|
| ILMN_73404  | HS.66187  | Hs.66187       | -0.739461635 | 3.43E-05    |
| ILMN_102651 | HS.534913 | Hs.534913      | -0.768671182 | 0.000254614 |
| ILMN_7661   | CRMP1     | NM_001313.3    | -0.774916938 | 0.000241965 |
| ILMN_28349  | SLC37A1   | NM_018964.3    | -0.795797406 | 0.000190282 |
| ILMN_5664   | TERF2IP   | NM_018975.2    | -0.802392858 | 1.30E-05    |
| ILMN_14516  | RNF165    | NM_152470.2    | -0.806229535 | 2.91E-05    |
| ILMN_19021  | CADPS     | NM_003716.2    | -0.838561327 | 9.16E-06    |
| ILMN_28602  | SHISA2    | NM_001007538.1 | -0.844574981 | 0.000270268 |
| ILMN_4854   | HES6      | NM_018645.3    | -0.847373664 | 4.10E-05    |
| ILMN_139392 | ZNF491    | NM_152356.2    | -0.856278144 | 0.000137582 |
| ILMN_9517   | ATP6V0E2  | NM_145230.2    | -0.858623898 | 5.40E-05    |
| ILMN_2195   | SPG3A     | NM_015915.3    | -0.861608172 | 1.11E-05    |
| ILMN_8955   | NRCAM     | NM_005010.3    | -0.862128693 | 2.72E-06    |
| ILMN_15951  | NOVA1     | NM_002515.2    | -0.87199304  | 8.51E-06    |
| ILMN_28536  | RUNDC3B   | NM_138290.1    | -0.883186646 | 0.000144139 |
| ILMN_20684  | TSPAN7    | NM_004615.2    | -0.883388624 | 0.00013353  |
| ILMN_30166  | ST18      | NM_014682.1    | -0.884005424 | 0.000192362 |
| ILMN_22353  | KIF3C     | NM_002254.6    | -0.896488643 | 4.20E-05    |
| ILMN_4065   | 3-Sep     | NM_019106.4    | -0.90582207  | 5.11E-05    |
| ILMN_5524   | FAM36A    | NM_198076.4    | -0.931036339 | 2.94E-05    |
| ILMN_13498  | FABP7     | NM_001446.3    | -0.940826772 | 7.74E-05    |
| ILMN_14582  | ARHGEF7   | NM_145735.1    | -0.967906331 | 0.000261185 |
| ILMN_35173  | LMTK3     | XM_936372.2    | -0.973555875 | 0.000211626 |
| ILMN_30217  | KCTD10    | NM_031954.3    | -1.002404439 | 1.72E-05    |
| ILMN_4065   | 3-Sep     | NM_019106.4    | -1.010545504 | 5.51E-05    |
| ILMN_15828  | PGM2L1    | NM_173582.3    | -1.018131469 | 0.000283528 |
| ILMN_171526 | MAP6      | NM_207577.1    | -1.018456284 | 9.43E-05    |
| ILMN_45961  | LOC283683 | XM_931224.1    | -1.018872982 | 9.18E-06    |
| ILMN_14093  | SYT1      | NM_005639.1    | -1.024509741 | 7.35E-05    |
| ILMN_30286  | LOC387856 | NM_001013635.2 | -1.030101103 | 7.91E-05    |
| ILMN_38941  | 5-Sep     | NM_002688.4    | -1.053259827 | 0.000195416 |
| ILMN_15722  | NOVA1     | NM_006491.2    | -1.054210868 | 7.64E-05    |
| ILMN_177099 | RAB6B     | NM_016577.3    | -1.063077917 | 0.000274542 |
| ILMN_29470  | RFTN1     | NM_015150.1    | -1.071849571 | 9.64E-05    |
| ILMN_4868   | CDK5R1    | NM_003885.2    | -1.098687775 | 0.00016337  |
| ILMN_11325  | CCNA1     | NM_003914.2    | -1.099551549 | 4.03E-07    |
| ILMN_163847 | TBR1      | NM_006593.2    | -1.110163743 | 0.000122049 |
| ILMN_9016   | RUNDC3A   | NM_006695.3    | -1.110188832 | 0.000316897 |
| ILMN_18430  | DCLK1     | NM_004734.2    | -1.119236848 | 5.13E-05    |
| ILMN_7302   | TAGLN3    | NM_001008273.1 | -1.124128508 | 5.17E-05    |
| ILMN_22045  | PHYHIPL   | NM_032439.1    | -1.12739938  | 9.70E-05    |
| ILMN_178729 | FSTL5     | NM_020116.2    | -1.143639898 | 0.000101416 |
| ILMN_17259  | NLRP2     | NM_017852.2    | -1.167234036 | 0.000215993 |
| ILMN_86876  | HS.347185 | Hs.347185      | -1.169750612 | 0.000177511 |
| ILMN_7211   | CRMP1     | NM_001014809.1 | -1.172423646 | 0.000302092 |
| ILMN_22617  | KIF1A     | NM_004321.4    | -1.174345091 | 3.44E-05    |
| ILMN_17827  | SCG2      | NM_003469.3    | -1.193019265 | 0.000224568 |
| ILMN_82312  | HS.212483 | Hs.212483      | -1.196158677 | 1.70E-05    |
| ILMN_10344  | POU2F2    | NM_002698.2    | -1.324022582 | 2.03E-06    |

## Supplementary Table 2 (Lee et al.,)

|             |           |                |              |             |
|-------------|-----------|----------------|--------------|-------------|
| ILMN_22638  | NPTX2     | NM_002523.1    | -1.378885442 | 3.18E-05    |
| ILMN_16399  | TUBB3     | NM_006086.2    | -1.411074462 | 7.60E-05    |
| ILMN_30021  | SNAP25    | NM_130811.1    | -1.430828644 | 0.000251042 |
| ILMN_166209 | KIAA0363  | XM_001133202.1 | -1.431999403 | 0.00027131  |
| ILMN_22293  | KLC1      | NM_005552.4    | -1.494765099 | 0.000222789 |
| ILMN_23656  | SH3GL2    | NM_003026.1    | -1.495619849 | 3.68E-05    |
| ILMN_178294 | PCSK1     | NM_000439.3    | -1.5086561   | 6.45E-05    |
| ILMN_110584 | HS.551307 | Hs.551307      | -1.53342931  | 0.000143359 |
| ILMN_22819  | CNR1      | NM_016083.3    | -1.542052306 | 1.95E-05    |
| ILMN_8091   | TNRC4     | NM_007185.3    | -1.546940936 | 7.70E-05    |
| ILMN_1495   | HMP19     | NM_015980.3    | -1.587779943 | 0.000250368 |
| ILMN_18781  | MAP4      | NM_030885.2    | -1.597548861 | 2.99E-05    |
| ILMN_17528  | MEIS2     | NM_172315.1    | -1.615814692 | 0.000111091 |
| ILMN_22291  | RUFY3     | NM_014961.2    | -1.680531997 | 1.94E-05    |
| ILMN_15248  | SNAP91    | NM_014841.1    | -1.726425948 | 4.23E-05    |
| ILMN_3667   | MYT1      | NM_004535.2    | -1.739650619 | 0.000193631 |
| ILMN_173747 | D4S234E   | NM_001040101.1 | -1.761335984 | 0.000170665 |
| ILMN_19345  | ISLR2     | NM_020851.1    | -1.802727747 | 0.000216025 |
| ILMN_174587 | RTN1      | NM_021136.2    | -1.840762118 | 6.52E-05    |
| ILMN_167702 | FLJ25404  | XM_001134320.1 | -1.911286839 | 4.19E-06    |
| ILMN_3435   | RTN1      | NM_206852.1    | -1.936634937 | 1.04E-05    |
| ILMN_23892  | ASCL1     | NM_004316.2    | -1.954576925 | 3.23E-06    |
| ILMN_31184  | FLJ33790  | NM_001039548.1 | -2.001193542 | 8.48E-06    |
| ILMN_9766   | INA       | NM_032727.2    | -2.118681428 | 2.06E-05    |
| ILMN_162349 | STMN4     | NM_030795.2    | -2.251357097 | 0.000105361 |
| ILMN_10286  | SLC17A6   | NM_020346.1    | -2.28086546  | 1.09E-05    |
| ILMN_27672  | STMN2     | NM_007029.2    | -2.301403735 | 6.16E-06    |
| ILMN_23104  | ZNF69     | NM_021915.1    | -2.434994226 | 1.12E-05    |

**Supplementary Table 3 (Lee et al.,)**

| Name                   |         | Sequunce (5' ->3')            | Anne aling temp. | Amplicon size (bps)        |
|------------------------|---------|-------------------------------|------------------|----------------------------|
| IKBKAP (RT-PCR)        | Forward | CGGATTGTCACTGTTGTGC           | 60               | 393(normal)<br>391(mutant) |
|                        | Reverse | GACTGCTCTCATAGCATCGC          |                  |                            |
| IKBKAP (qRT-PCR)       | Forward | GCAGCAATCATG TGTCCC           | 60               | 142                        |
|                        | Reverse | ACCAGGGCTCGATGATGA            |                  |                            |
| IKBKAP (Sequencing)    | Forward | CCATAAGGCTCAAAGCGAAA          | 60               | 619                        |
|                        | Reverse | TGAGTGTACGATTCTTTCTGC         |                  |                            |
| Nanog (Bisulfite seq.) | Forward | AGAGATAGGAGGGTAAGTT<br>TTTTTT | 58               | 250                        |
|                        | Reverse | ACTCCACACAACTAACTT<br>TTATTC  |                  |                            |

**Supplementary Figures, Tables and Video**

**Supplementary Figure 1: Schematic outline of study design.** FD-iPSCs were derived via reprogramming of patient specific fibroblast using a 4 factor protocol (Oct4, Sox2, Klf4 and Myc) in a lentiviral vector system. Following characterization of pluripotent state, FD-iPSCs were differentiated into multiple lineages (hematopoietic, neuroepithelial, neural crest, endothelial and endodermal cells) and purified based on surface marker expression. Differentiated lineages were used to demonstrate tissue specific *IKBKAP* splicing in FD-iPSC progeny. FD-iPSC derived neural crest precursors were further used to identify disease specific genetic and functional differences related to neurogenesis and cell migration. Drug validation studies assessed the potential of kinetin to mitigate disease-related effects on splicing, neurogenesis and migration in FD-iPSC derived neural crest precursors.

**Supplementary Figure 2: Silencing of 4 factors during reprogramming and lack of reactivation upon differentiation.** **a**, Transduced fibroblasts were analyzed by flow cytometry to determine transduction efficiency. **b-c**, Representative flow cytometric analysis of FD-iPSCs (SSEA4+) and differentiated neural crest cells (HNK1+) showed lack of transgene expression based on fluorescence reporter signal.

**Supplementary Figure 3: Additional characterizations of pluripotency in FD-iPSC lines.** **a**, Heatmap analysis and hierarchical clustering showed that the global gene expression profiles of FD-iPS cells were similar to those of human ESCs. **b**, FD-iPS and human ESC clones showed comparable survival and expansion of single cells (subcloning efficiency) upon dissociation in accutase. **c**, Percentages of SSEA4+ / Nanog+ colonies in multiple FD-iPSC lines. **d**, Representative images of SSEA4+/Nanog+ colonies in FD-iPS clones. **e**, Beating cardiomyocytes (**Supplementary Video 1**) were stained with sarcomeric myosin (sMyosin) and  $\alpha$ -actinin. Scale bars in **(d)** and **(e)** correspond to 50 $\mu$ m.

## Supplementary Materials & Figure Legends (Lee et al.,)

**Supplementary Figure 4: Morphology of neural differentiation of FD-iPSC derived cells.** Representative images of neural rosettes derived from FD-iPSC #22 clone (a) and #4 clone (b). Scale bar correspond to 50 $\mu$ m.

**Supplementary Figure 5: Validation of microarray data by qRT-PCR analysis.** qRT-PCR analysis for confirmation of expression array data in control hESC (H9), iPSC (C14) and FD-iPSC derived neural crest precursors.  $n = 4$ ; \*,  $P < 0.05$ ; \*\*\*,  $P < 0.001$ . All values are mean  $\pm$  s. d.

**Supplementary Figure 6: Reproducibility of disease-related phenotypes among neural crest precursors derived from different FD-iPSC lines.** a, *IKBKAP* RT-PCR analysis of neural crest cells derived from control hESC (H9), control iPSC (C14) and four different FD-iPSC clones. b-d, qRT-PCR analyses, quantification of Tuj1 and MASH1 protein expression and migration assay in neural crest cells derived from control hESC (H9), control iPSC (C14) and multiple FD-iPSC clones ( $n = 3 - 6$ ; \*,  $P < 0.05$ ; \*\*,  $P < 0.01$ ; \*\*\*,  $P < 0.001$ . All values are mean  $\pm$  s. d).

**Supplementary Figure 7: Gel image of *IKBKAP* RT-PCR upon treatment of FD fibroblasts with candidate chemical compounds.** The ratio of normal:mutant (WT:MU) splicing was significantly increased in kinetin treatment.

**Supplementary Figure 8: Quantification of normal *IKBKAP* transcript with kinetin treatment in control iPSC and FD-iPSC derived neural crest cell.**  $n = 3$ ; \*,  $P < 0.05$ ; \*\*,  $P < 0.01$ ; \*\*\*,  $P < 0.001$ . All values are mean  $\pm$  s. d.

**Supplementary Figure 9: Short-term (for 24 hours) treatment of kinetin for FD-iPSC derived neural crest cells.** a-b, Quantification of MASH1 and Tuj1 expressing neural crest cells derived from FD-iPSC with/without kinetin treatment and control-iPSC. MASH1 (c) and SCG10 (d) expression in neuronal differentiation with kinetin treated neural crest cells derived from FD-iPSC. Results of wound healing assay (e) and paxillin staining (f) of kinetin treated FD-iPSC derived neural crest cells.  $n = 3 - 5$ ; \*\*\*,  $P < 0.001$ . All values are mean  $\pm$  s. d.

## Supplementary Materials & Figure Legends (Lee et al.,)

**Supplementary Figure 10: Five-day treatment of kinetin for FD-iPSC derived neural crest cells.** **a**, Quantification of Tuj1 expressing neural crest cells derived from FD-iPSC with/without kinetin treatment and Control-iPSC. **b**, MASH1 and SCG10 expression in kinetin-treated neural crest cells derived from FD-iPSC (\*\*\*,  $P < 0.001$ ).  $n = 4 - 6$ ; All values are mean  $\pm$  s. d.

**Supplementary Figure 11: Schematic illustration of kinetin treatment regimens.** FD-iPSCs were treated either continuously (28 days) starting 1 day prior to differentiation until analysis (arrowhead) or treated short-term at the neural crest precursor stage following isolation of HNK1+ cells (1 day or 5 day treatment).

**Supplementary Table 1:** Genetic analysis confirms the identity of FD-fibroblast and FD-iPSC. DNA microsatellite genotyping of FD-fibroblast showed same result as that of FD-iPSC.

**Supplementary Table 2:** Gene expression array data of significantly up-regulated and down-regulated genes in FD-iPSC derived neural crest cells over H9 embryonic stem cells and C14-iPSC derived counterpart cells.

**Supplementary Table 3:** Sequences of primers used for sequencing and PCR analysis.
